# Supplementary material for: Protein binding hot spots and the residue-residue pairing preference: a water exclusion perspective
Source: Springer Nature journal article supplement (doi:10.1186/1471-2105-11-244), 2010-05-12
Supplement: 12859_2009_3701_MOESM1_ESM.pdf [file 12859_2009_3701_MOESM1_ESM.pdf]

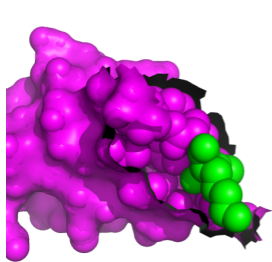

(a) Biclique location at the interface of Chain I in 2PTC

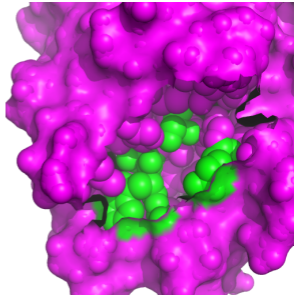

(b) Biclique location at the interface of Chain E in 2PTC

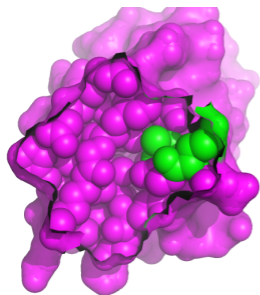

(c) Biclique location at the interface of Chain B in 2ACY

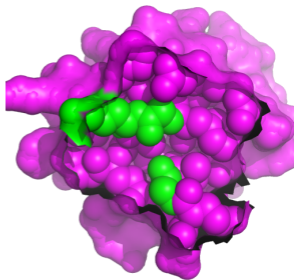

(d) Biclique location at the interface of Chain A in 2ACY
