# Supplementary material for: Protein binding hot spots and the residue-residue pairing preference: a water exclusion perspective
Source: Springer Nature journal article supplement (doi:10.1186/1471-2105-11-244), 2010-05-12
Supplement: 12859_2009_3701_MOESM2_ESM.pdf [file 12859_2009_3701_MOESM2_ESM.pdf]

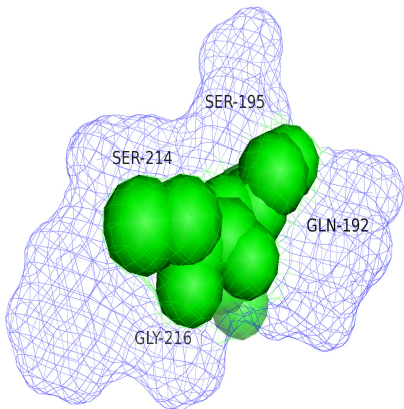

(a) Biclique Structure at Chain H and P in 1BTH

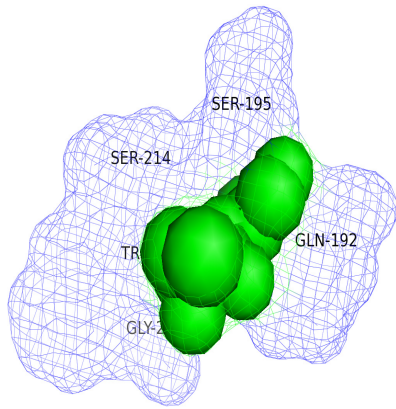

(b) Biclique Structure at Chain A and B in 1EJA

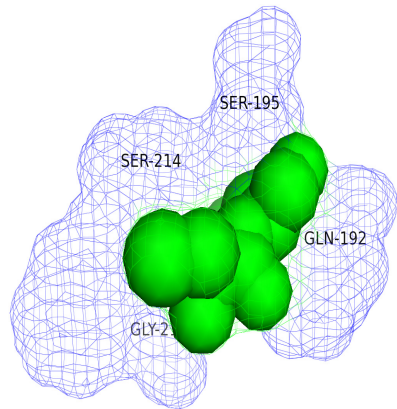

(c) Biclique Structure at Chain E and I in 2PTC

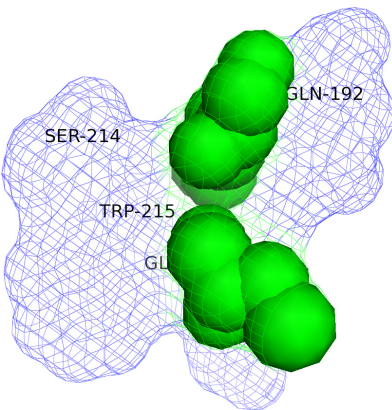

(d) Biclique Structure at Chain Z and I in 1TGS

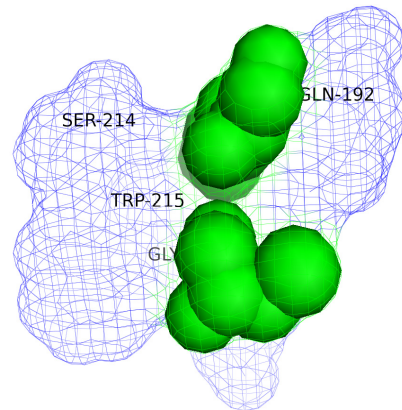

(e) Biclique Structure at Chain E and I in 2BTC

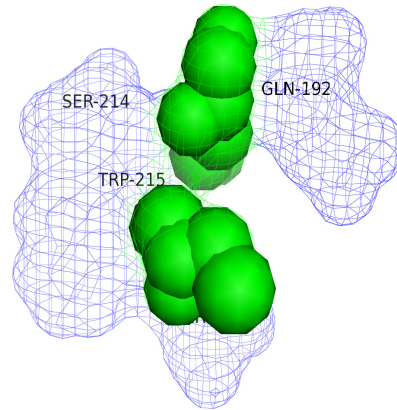

(f) Biclique Structure at Chain E and I in 1TAB
