# Supplementary material for: Protein binding hot spots and the residue-residue pairing preference: a water exclusion perspective
Source: Springer Nature journal article supplement (doi:10.1186/1471-2105-11-244), 2010-05-12
Supplement: 12859_2009_3701_MOESM3_ESM.pdf [file 12859_2009_3701_MOESM3_ESM.pdf]

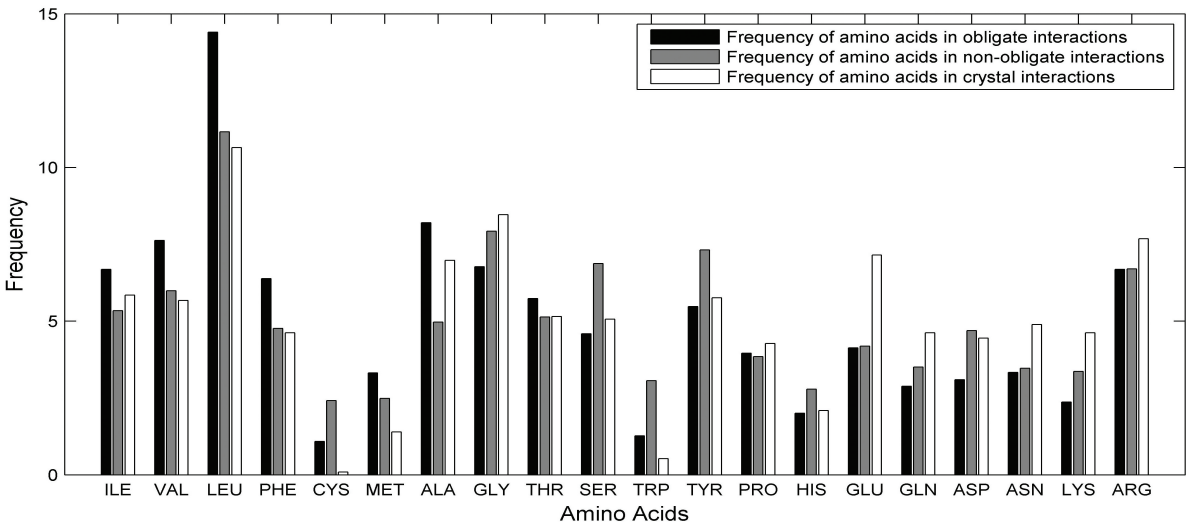

(a) Frequencies of the residues in the DWE bicliques for the three types of protein interactions.

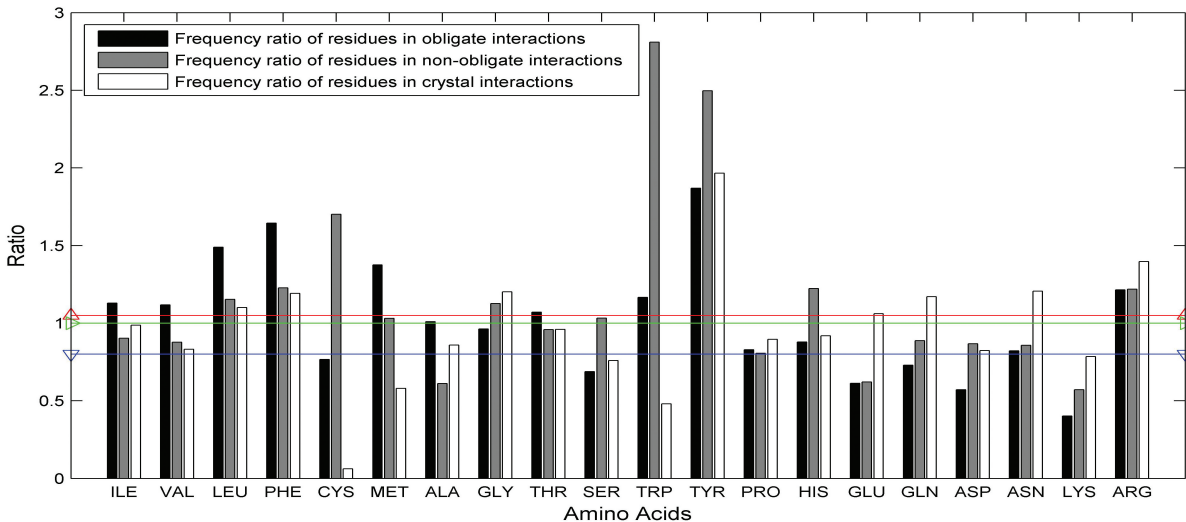

(b) Ratios of residue frequencies in the DWE bicliques for the three types of protein interactions over the background residue frequencies.
