# Supplementary material for: Protein binding hot spots and the residue-residue pairing preference: a water exclusion perspective
Source: Springer Nature journal article supplement (doi:10.1186/1471-2105-11-244), 2010-05-12
Supplement: 12859_2009_3701_MOESM4_ESM.pdf [file 12859_2009_3701_MOESM4_ESM.pdf]

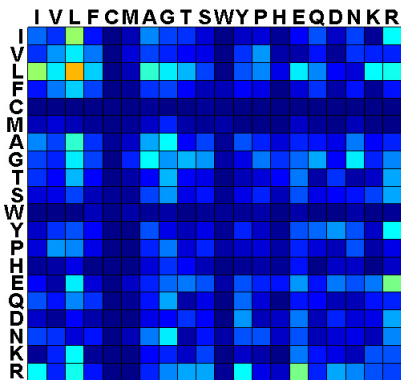

(a) Frequencies of Residue Pairs for Crystal Packing

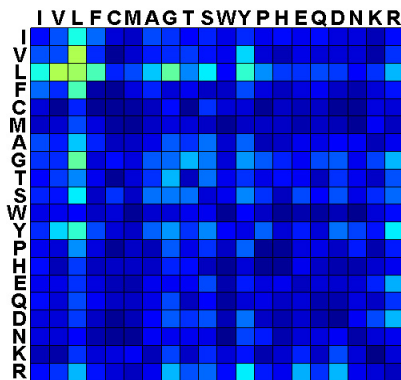

(b) Frequencies of Residue Pairs for Non-obligate Interactions

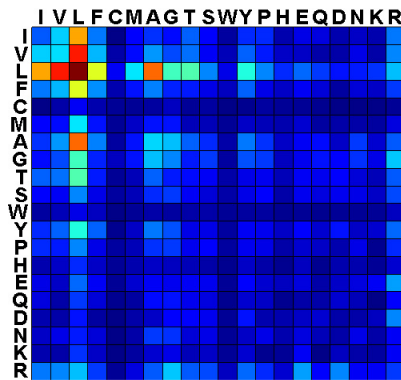

(c) Frequencies of Residue Pairs for Obligat Interactions

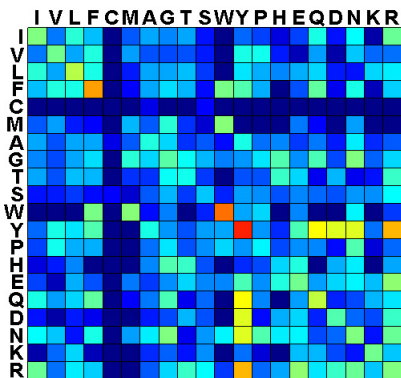

(d) Frequency Ratios of Residue Pairs for Crystal Packing

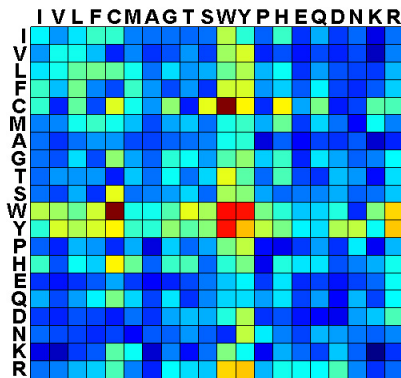

(e) Frequency Ratios of Residue Pairs for Non-obligate Interactions

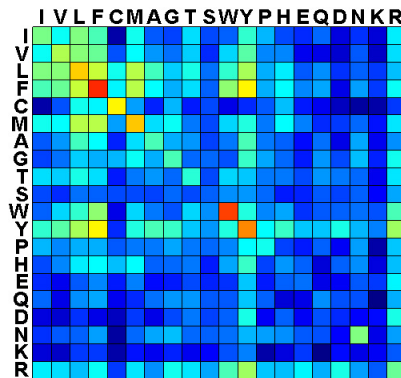

(f) Frequency Ratios of Residue Pairs for Obligat Interactions
